# Supplementary material for: The construction of a three-dimensional donor/acceptor interface based on a bilayered titanium dioxide nanorod array-flower for perovskite solar cells
Source: Royal Society of Chemistry journal article supplement (doi:10.1039/d2nr05475b), 2022-11-25
Supplement: d2nr05475b1.pdf [file d2nr05475b1.pdf]

## Supporting Information

The construction of three-dimensional donor/acceptor interface based on bilayered titanium dioxide nanorod array-flower for perovskite solar cells

Feng Gao\*, Weihua Hong, Ziyang Zhao, Chao Zhang, Xiaoting Deng, Ying Zhang

School of Food and Chemical Engineering, Shaoyang University, Shaoyang, 422000, P.R. China

\*Corresponding authors: E-mail: [gaofeng137@tju.edu.cn](mailto:gaofeng137@tju.edu.cn)

## Results

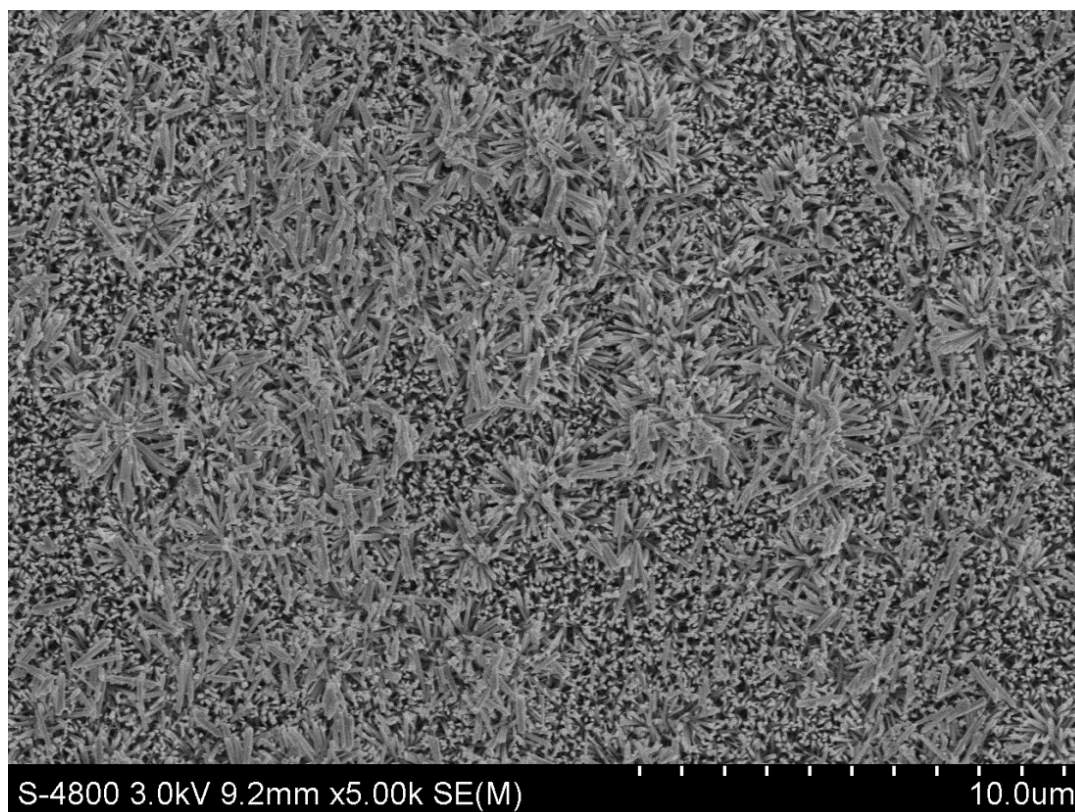

**Figure S1.** The TOP view of SEM image of the B-TiO<sub>2</sub>-NAF

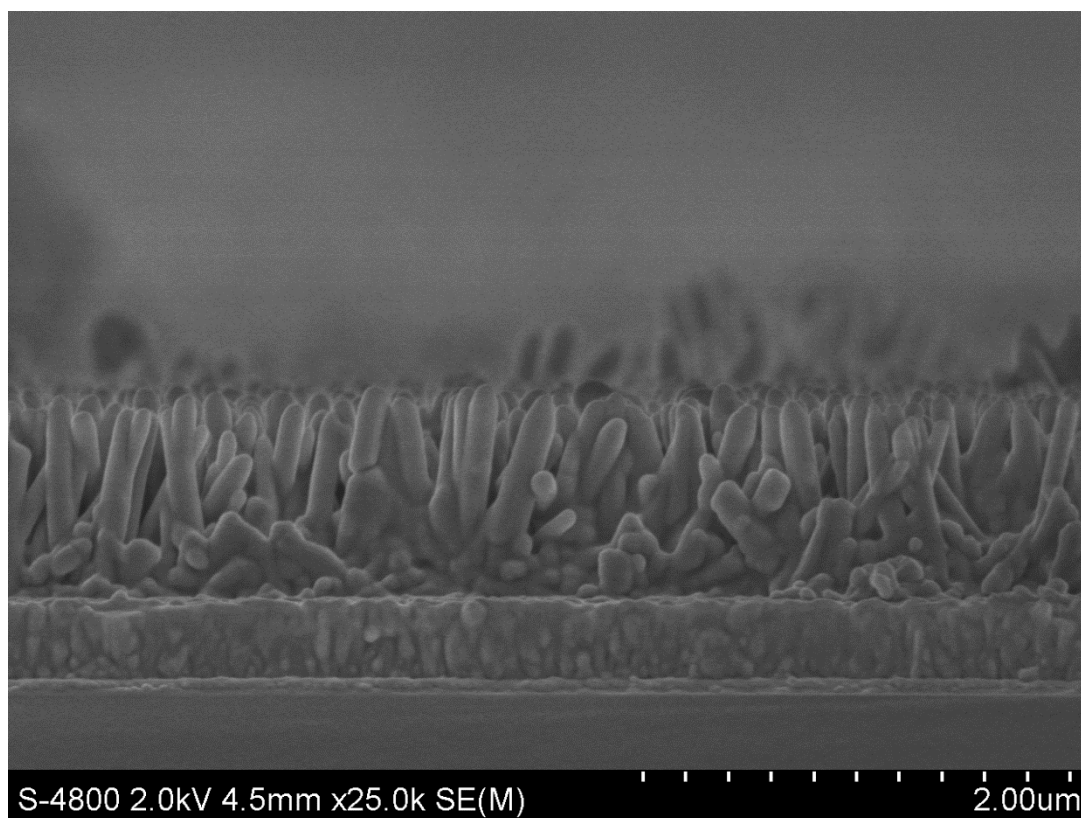

**Figure S2.** The cross section of SEM image of the B-TiO<sub>2</sub>-NAF

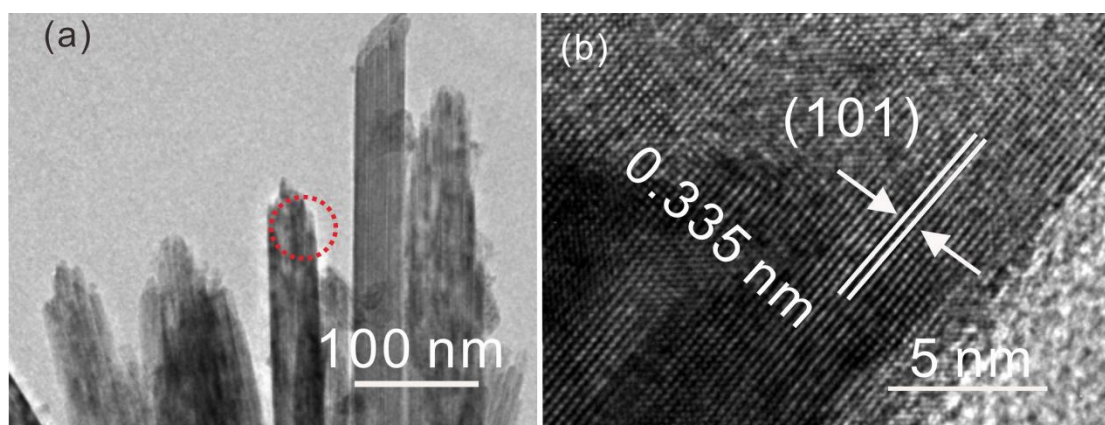

**Figure S3.** TEM Stripping from FTO (a) and HRTEM (b) images of the B-TiO<sub>2</sub>-NAF.

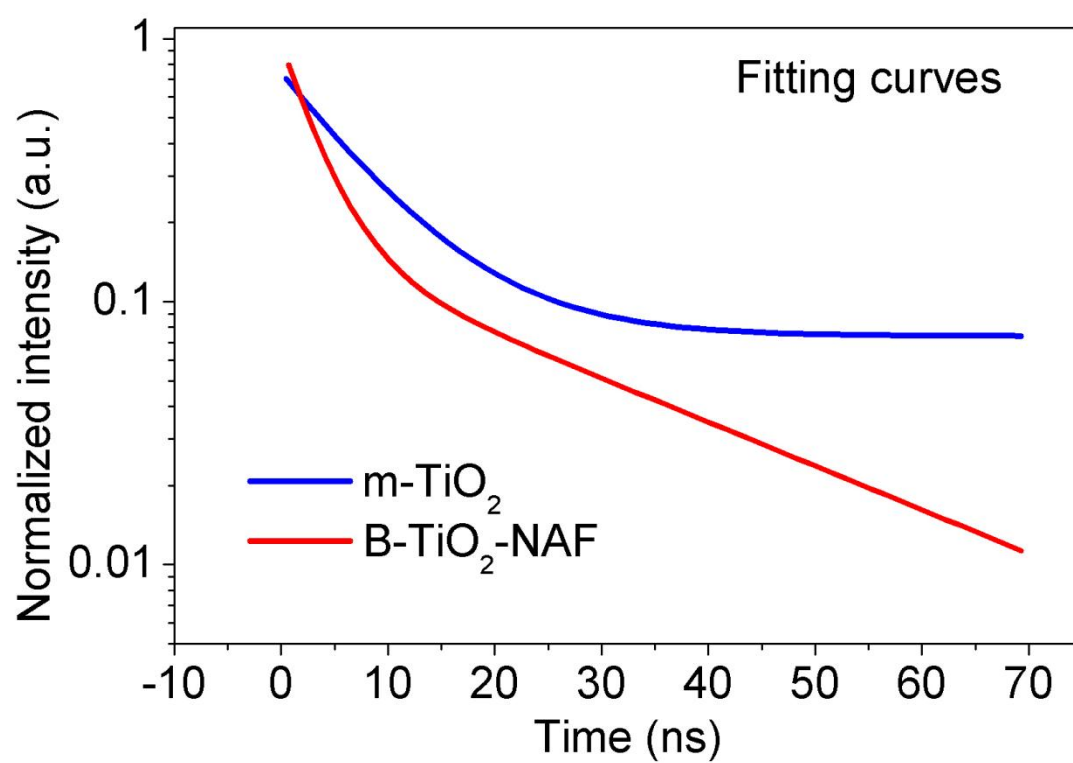

**Figure S4.** TR-PL fitting curves of the prevoskite film on B-TiO<sub>2</sub>-NAF and m-TiO<sub>2</sub> substrates.

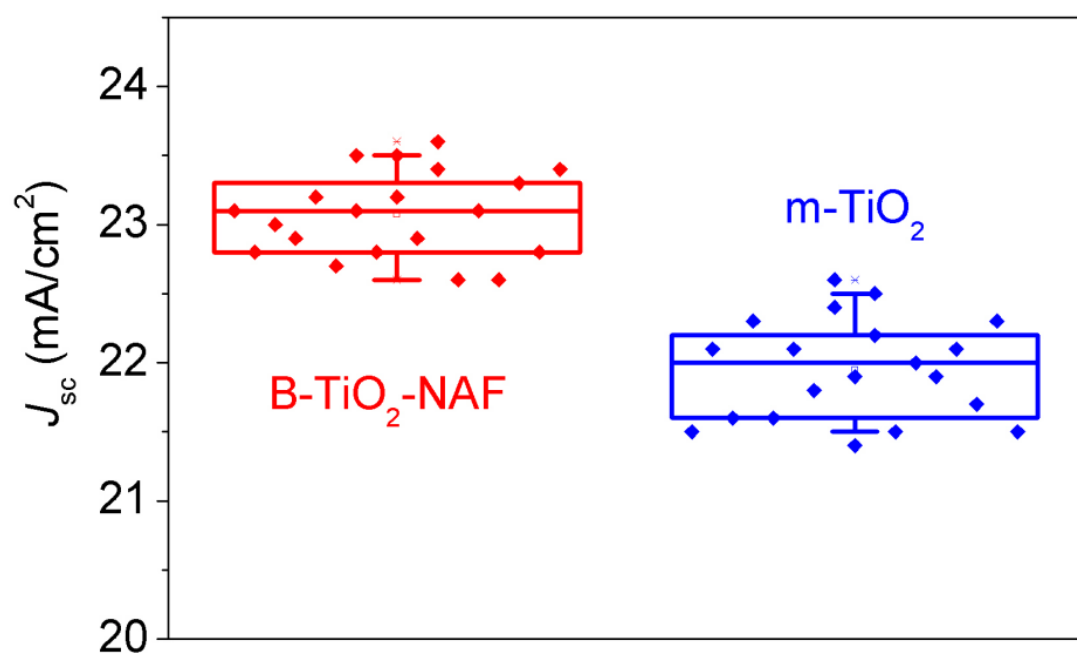

**Figure S5.** Statistics of  $J_{sc}$  distribution among 20 devices based on m-TiO<sub>2</sub> and B-TiO<sub>2</sub>-NAF

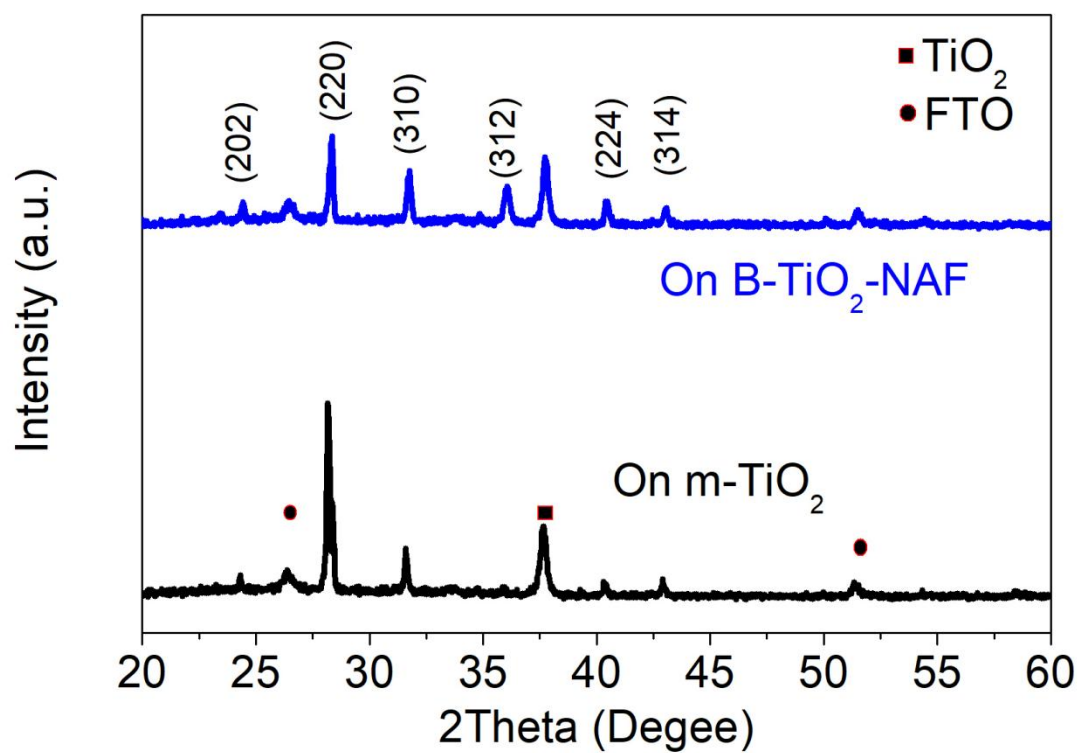

**Figure S6.** XRD patterns of  $\text{CH}_3\text{NH}_3\text{PbI}_3$  on B-TiO<sub>2</sub>-NAF/FTO and m-TiO<sub>2</sub> thin film.

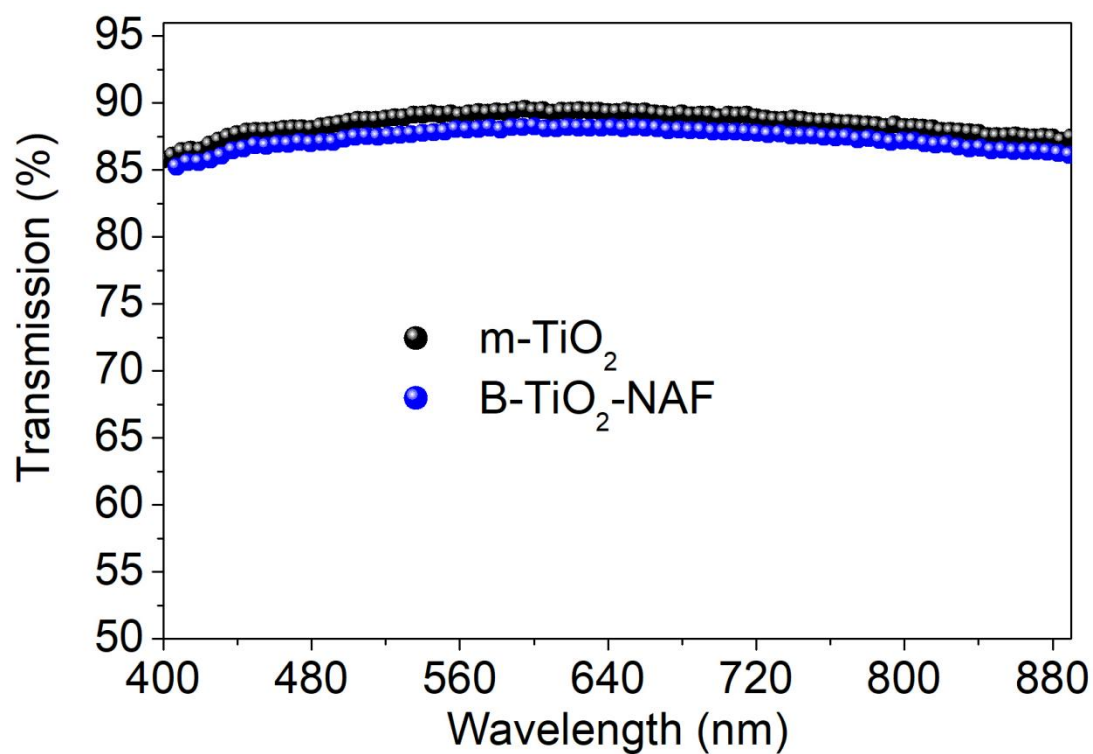

**Figure S7.** The transmittance spectra of the m-TiO<sub>2</sub> and B-TiO<sub>2</sub>-NAF in thin film.  
[The transmissivity of B-TiO<sub>2</sub>-NAF is slightly lower than that of m-TiO<sub>2</sub>, indicating that both of them are good light transmitting materials]



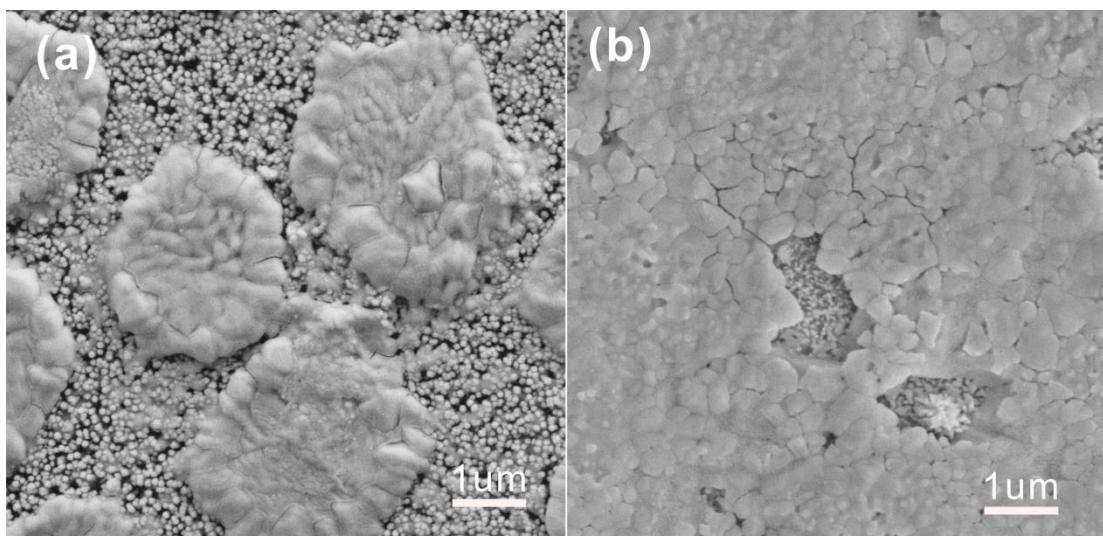

**Figure S8.** SEM images of  $\text{CH}_3\text{NH}_3\text{PbI}_3$  on B- $\text{TiO}_2$ -NAF/FTO (a) and m- $\text{TiO}_2$  (b) thin film.

[The  $\text{CH}_3\text{NH}_3\text{PbI}_3$  grown on B- $\text{TiO}_2$ -NAF/FTO form many large blocky crystals due to the bilayered structure. While the  $\text{CH}_3\text{NH}_3\text{PbI}_3$  on m- $\text{TiO}_2$  shows the typical plane structure with the smaller crystal particle size. ]



**Table S1** The average performance of 20 devices

| Device based on         | $V_{oc}$<br>(v) | $J_{sc}$<br>(mA cm <sup>-2</sup> ) | FF<br>(%) | PCE<br>(%) |
|-------------------------|-----------------|------------------------------------|-----------|------------|
| m-TiO <sub>2</sub>      | 1.07±1.02       | 22.0±0.51                          | 81±1.12   | 19.4±0.61  |
| B-TiO <sub>2</sub> -NAF | 1.11±1.01       | 23.1±0.62                          | 82±1.08   | 21.2±0.42  |
